# Supplementary material
Source: publisher figshare collection journal article supplement (https://tandf.figshare.com/ndownloader/files/13596995)

**Supporting Information**

Table of Contents

|  |  |  |
| --- | --- | --- |
| 1 | General Information | S2 |
| 2 | Experimental Section, Characterization Data | S3 – S12 |
| 3 | Copy of 1H and13C Spectra | S13 – S25 |

**1. General Information**

All experiments were carried out using standard conditions. All solvents were reagent grade or better and were purified [S1]. Milli Q water was used for preparing the buffers. Salts used for preparing buffers were Analytical grade or biochemical grade. pH was adjusted using NaOH. All buffer solutions were prepared according to standard procedure and stored at 0 °C. Deuterated solvents were used as received without any further purification. Chloroacetyl chloride was distilled and stored under Argon. TEA and Pyridine were freshly distilled prior to use. Thin layer chromatography (TLC) analyses were performed on Merck Analytical Chromatography aluminum plates bearing a 0.25 mm layer of Merck Silica gel 60 F254, which were visualized with UV light at 254 nm or developed using iodine. Ninhydrin (0.2 g in 100 mL EtOH) spraying and drying (110 °C) was performed as per standard TLC visualizing conditions for amines, amino alcohols and amino acids. Bromophenol blue (0.1 gm in 500 mL EtOH) (similar to bromocresol green) spraying and dipping in NaOH (0.1 M) was performed as per standard TLC visualizing conditions for detecting unreacted chloroacetyl chloride or formation of chloroacetic acid (pale yellow spot). Column chromatography was performed with SiO2 (Fisher Scientific Silicagel (100-200 mesh). NMR was measured using 1H NMR (500 MHz), 13C NMR spectra were recorded on the 125 MHz NMR Bruker AVANCE III spectrometer. Deuterated chloroform or DMSO was used as the solvent, and chemical shift values (δ) are reported in parts per million relatives to the residual signals. Abbreviations used in the NMR follow-up experiments: br, broad; s, singlet; d, doublet; t, triplet; m, multiplet. NMR spectra were processed using ACD/NMR processor Academic Edition, version 12.01 [S2]. Mass spectra were obtained on Waters SYNAPT G2 with 2D nano ACQUITY System with ionization voltages of 70 eV. High-resolution mass spectra (HRMS) were obtained by fast atom bombardment (FAB) using a double focusing magnetic sector mass spectrometer and electron impact (EI) ionization technique (magnetic sector-electric sector double focusing mass analyzer).

Abbreviations used: ABA – Amino benzyl alcohol; CAC – Chloroacetyl Chloride

[S1] W. L. F. Armarego and D. D. Perrin, Purification of Laboratory Chemicals, Pergamon Press, Oxford, ed 3. 1988.

[S2] ACD/NMR processor Academic Edition, version 12.01.Advanced Chemistry Development, Inc., Toronto, ON, Canada, www.acdlabs.com, 2015.

**EXPERIMENTS**

**2.1 Procedure for the reaction of CAC with various amines or anilines:**

In a 5 mL round-bottom flask, the amine/aniline (0.75 mmol) was mixed with buffer (10 μL/mg of substrate). The **propylene oxide** (2 equiv.) was added to the reaction mixture. Then the mixture was cooled **(0-5 °C, ice bath)** and CAC (0.80 mmol) was added drop wise to the solution. Once the addition was over, the mixture was stirred **until TLC analysis showed completion of the reaction (15-20 min)**. The aqueous layer was extracted with Ethyl acetate (5 X 2 mL). The organic layers were washed with brine (1 X 2 mL) dried over Na2SO4 and concentrated *in vacuo*. The crude mixture was analysed by NMR and the ratio of the products were obtained.

| 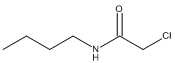 | Yellow oil (Org. Lett. 2004, 6, 4805)  1H NMR (500 MHz, CDCl3)  ppm 0.94 (t, *J* = 7.0 Hz, 3H), 1.35-1.39 (m, 2H), 1.52-1.58 (m, 2H), 3.32-3.36 (m, 2H), 4.16 (s, 2H), 6.85 (br. s, 1H)  13C NMR (125 MHz, CDCl3)  ppm 13.65, 20.02, 32.63, 39.56, 42.60, 164.75  ESI-MS calcd for C6H12ClNO (M+H)+ 150.0685, found 150.2034 |
| --- | --- |
| 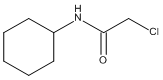 | White solid, m.p. 113-114 °C; (Bioorg. Med. Chem, 2010, 18, 4975)  1H NMR (500 MHz, CDCl3)  ppm 1.13 - 1.23 (m, 3H) 1.31 - 1.39 (m, 2H) 1.59-1.62, m, 1H), 1.69-1.73 (m, 2H), 1.88-1.91 (m, 2H), 3.73-3.79 (m, 1H), 4.08 (s, 2H) 6.65 (br. s., 1H)  13C NMR (125 MHz, CDCl3)  ppm 24.59, 25.26, 32.63, 42.60, 48.52, 164.75  ESI-MS calcd for C8H14ClNO (M+H)+176.66, found176.08,178.08 (M+H+2)+ |
| 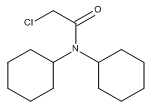 | White solid, m.p. 115-116 °C; (Acta Crystal, Sect. E. Str. Rep. online, 2007, 63, 04539)  1H NMR (500 MHz, CDCl3)  ppm 4.13 (s, 2H), 3.83-3.85 (m, 2H), 2.10-2.12 (m, 2H), 1.84-1.87 (m, 4H), 1.78-1.80 (m, 2H), 1.67-1.69 (m, 2H), 1.52-1.60 (m, 4H), 1.20-1.26 (m, 6H)  HRMS (EI+) calcd for C14H24ClNO (M+H)+ 258.1625, found 258.1642 |
| 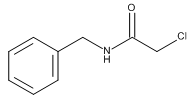 | White solid, m.p. 95 °C (Eur. J. Med. Chem. 2009, 44, 2975-2984.)  1H NMR (500 MHz, CDCl3)  ppm 4.12 (s, 2H) 4.52 (s, 2H) 6.85 (br. s, 1H), 7.30 - 7.34 (m, 2H), 7.36 - 7.41 (m, 3H)  13C NMR (125 MHz, CDCl3)  ppm 41.59, 42.29, 126.18, 126.52, 127.42, 137.18, 165.51  ESI-MS calcd for C9H10ClNO (M+H)+ 184.63, found 184.08, 186.07 (M+H+2)+ |
| 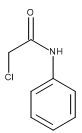 | White solid, m.p. 137 °C; (Bioorg. Med. Chem, 2010, 18, 4975)  1H NMR (500 MHz, CDCl3)  ppm ppm 4.20 (s, 2H), 7.13–7.09 (m, 1H), 7.30–7.27 (m, 2H), 7.55–7.53 (m, 2H), 8.44 (br. s, 1H).  13C NMR (125 MHz, CDCl3)  ppm 42.64, 119.29, 123.57, 127.96, 137.13, 164.17  ESI-MS calcd for C8H8ClNO (M+H)+ 170.60, found 170.03, 172.02 (M+H+2)+ |
| 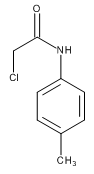 | White solid, m.p. 164 °C; (Bioorg. Med. Chem, 2004, 12, 3471)  1H NMR (500 MHz, CDCl3)  ppm 2.36 (s, 3H), 4.24 (s, 2H), 7.19 (d, *J*=7.88 Hz, 2H), 7.44 (d, *J*=8.51Hz, 2H), 8.26 (br. s, 1H)  13C NMR (125 MHz, CDCl3)  ppm 20.85, 43.66, 120.03, 129.35, 133.57, 135.90, 164.97  ESI-MS calcd for C9H10ClNO (M+H)+ 184.63, found 184.04, 186.03 (M+H+2)+ |
| 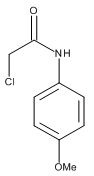 | White solid, m.p. 121 – 122 °C; (Org. Biomol. Chem., 2003, 1, 1989)  1H NMR (500 MHz, CDCl3)  ppm 3.83 (s, 3H), 4.24 (s, 2H), 6.91 (d, *J*=8.51Hz, 2H), 7.45 (d, *J*=8.51Hz, 2H), 8.26 (br. s., 1H)  13C NMR (125 MHz, CDCl3)  ppm 41.98, 53.72, 112.35, 120.06, 129.80, 154.52, 163.20  ESI-MS calcd for C9H10ClNO2 (M+H)+200.63, found 200.03, 202.03 (M+H+2)+ |
| 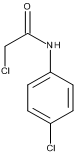 | Brown solid, m.p. 169 °C; (Org. Biomol. Chem., 2003, 1, 1989)  1H NMR (500 MHz, CDCl3)  ppm 4.22 (s, 2H) 7.29 (d, *J*=7.88 Hz, 2H) 7.58 (d, *J*=8.20 Hz, 2H), 9.33 (br. s. 1H)  13C NMR (125 MHz, CDCl3)  ppm 43.61, 121.32, 128.29, 128.78, 137.33, 165.17  ESI-MS calcd for C8H7Cl2NO (M+H)+203.99, found 204.01, 206.00 (M+H+2)+ |
| 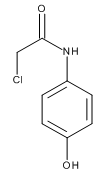 | White solid, m.p. 145 °C; (Bioorg. Med. Chem, 2007, 15, 2206)  1H NMR (500 MHz, CDCl3)  ppm 4.18 (s, 2H), 6.84 (m, *J*=8.20 Hz, 2H), 7.35 (d, *J*=8.20 Hz, 2H), 8.29(br. s., -NH), 9.5 (br. s, 1H).  13C NMR (125 MHz, DMSO-*d6*)  ppm 43.62, 115.51, 122.11, 129.92, 154.28, 164.76 |
| 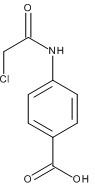 | White solid, m.p. 240 °C; (Tetrahedron Lett. 2006, 47, 6321)  1H NMR (500 MHz, CDCl3)  ppm 3.33 (br. s, 1H), 4.18 (s, 2H) 7.72 (d, *J*=6.25 Hz, 2H), 7.95 (d, *J*=6.31Hz, 2H), 10.34 (br. s, 1H)  13C NMR (125 MHz, CDCl3)  ppm 43.76, 118.83, 125.92, 130.64, 142.64, 165.29, 167.07  ESI-MS calcd for C9H8ClNO3 (M-Cl)+ 178.16, found 178.08 |
| 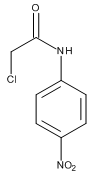 | Green solid, m.p. 182 °C; (Eur. J. Med. Chem.2009, 44, 2975–2984)  1H NMR (500 MHz, CDCl3)  ppm 4.13 (s, 2H), 7.64 - 7.78 (m, 2H), 7.89 - 8.13 (m, 2H), 10.11 (br. s., 1H)  13C NMR (125 MHz, CDCl3)  ppm 43.23, 119.46, 124.75, 143.38, 144.06, 165.46.  HRMS (EI+) calcd for C8H7ClN2O3(M+H)+ 215.0223, found 215.0224 |
| 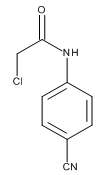 | Beige solid, m.p. 185 °C; (Eur. J. Med. Chem.2009, 44, 2975–2984)  1H NMR (500 MHz, CDCl3)  ppm 4.14 (s, 2H), 7.26-7.28 (m, 2H) 7.55-7.57 (m, 2H) 10.45 (br. s., 1H)  13C NMR (125 MHz, CDCl3)  ppm 42.28, 105.08, 117.70, 118.59, 131.76, 141.34, 164.43  ESI-MS calcd for C9H7ClN2O (M+H)+ 195.61, found 195.01 |
|  | (Eur J Med Chem. 2011, 46,2003-10)  1H NMR (500 MHz, CDCl**3**): δ 4.20 (s, 2H), 7.11 - 7.14 (m, 1H), 7.72 - 7.79 (m, 1H), 8.20 (d, 1H, *J* = 4.4 Hz), 8.31 - 8.35 (m, 2H), 8.9 (s, 1H).  ESI-MS calcd for C7H7ClN2O (M+H)+ 171.02, found 171.04 |
|  | Bioorganic Med. Chem., 18, 4975-4982, 2010.  1H NMR (500 MHz, CDCl3)  ppm 7.46-7.5 (m, 2H), 7.40-7.45, (m, 1H), 7.25-7.30 (m, 2H), 3.88 (s, 2H), 3.35 (s, 3H)  13C NMR (125 MHz, CDCl3)  ppm 38.08, 41.40, 127.05, 128.66, 130.12, 142.65, 166.62. |
|  | (Synthetic Communications, 2009, 39, 2723-2736)  1H NMR (500 MHz, DMSO-*d****6***): 4.24 (s, 2H), 6.47 (dd,*J* =8.0 and 2.0 Hz, 1H),6.91 (1H, d, *J* = 8.5Hz, 1H), 7.07 (t, *J* = 8.1 Hz,1H), 7.15 (t, *J* = 2.0 Hz, 1H), 9.44 (s, 1H) and 10.16 (s, 1H)  ESI-MS calcd for C8H8ClNO2 (M+H)+ 186.03, found 186.05 |

**2.2 Procedure for the competitive reaction between aniline and amines:**

In a 5 mL round-bottom flask, the amine and aniline (0.50 mmol each) were mixed with buffer (10 μL/mg). Additives were added (if used, as per Table 6).Then the mixture was cooled and CAC (0.50 mmol) was added drop wise to the solution. Once the addition was over, the mixture was stirred and TLC analysis was performed. The aqueous layer was extracted with Ethyl acetate (5 X 2 mL). The organic layers were washed with brine (1 X 2 mL) dried over Na2SO4 and concentrated *in vacuo*. The crude mixture was analysed by NMR and the ratio of the products were obtained.

| 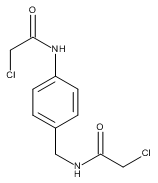 | 1H NMR (500 MHz, DMSO-*d6*)  ppm 4.02 (s, 2H), 4.15 (s, 2H), 4.27 (s, 2H), 7.18 (d, *J*=5.04 Hz, 2H) 7.53 (d, *J*=5.04 Hz, 2H), 8.60 (br. s, 1H), 10.26 (br. s, 1H)  13C NMR (125 MHz, DMSO- *d6*)  ppm 42.78, 42.87, 43.75, 119.90, 128.15, 134.36, 137.74, 164.88, 166.39  ESI-MS calcd for C11H12Cl2N2O2 (M+H)+275.0353, found 275.2168 |
| --- | --- |
| 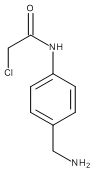 | Bioorganic Med. Chem., 14, 7862-7874, 2006.  1H NMR (500 MHz, CDCl3)  ppm 3.95 (s, 2H), 4.34 (s, 2H), 7.45-7.47 (m, 2H), 7.64-7.66 (m, 2H), 8.50 (br. s, 2H), 10.86 (br. s, 2H)  13C NMR (125 MHz, DMSO- *d6*)  ppm 42.24, 43.98, 119.71, 129.69, 130.09, 139.20, 165.29  ESI-MS calcd for C9H11ClN2O (M+H)+ 199.0637, found 199.1854 |

**2.3 Procedure for the reaction of amines and acid chlorides:**

In a 5 mL round-bottom flask, the corresponding amine (0.75 mmol) wasmixed with buffer (10 μL/1mg). Propylene oxide (2 equiv.) was added to the reaction mixture. Then the mixture was cooled and the corresponding acid chloride (0.83 mmol) was added drop wise to the solution. If the acid chlorides were solids, they were added directly in small quantities. Once the addition was over, the mixture was stirred and TLC analysis was performed. The aqueous layer was extracted with Ethyl acetate (5 X 2 mL). The organic layers were washed with brine (1 X 2 mL) dried over Na2SO4 and concentrated *in vacuo*. The crude mixture was analysed by NMR and the ratio of the products were obtained.

**Reactions of amines with various acid chlorides**

|  | Org. Prep.Proced. Int., 2005, 37, 198-203.  1H NMR (500 MHz, CDCl3) ppm7.18 (t, 1H, *J* = 7.3 Hz), 7.35 (t, 2H, *J*= 8.4 Hz), 7.48 (t, 2H, *J*= 7.0Hz), 7.55 (t, 1H, *J*= 7.3 Hz), 7.63 (d, 2H, *J* = 7.7 Hz), 7.87 (d, 2H, *J*= 8.1 Hz), 7.86 (s, 1H)  13C NMR (125 MHz, DMSO-*d6*)  ppm 118.82, 122.04, 125.86, 126.57, 126.80, 129.76, 133.11, 137.23, 164.12  ESI-MS calcd for C13H11NO (M+H)+ 198.0918, found 198.0793 |
| --- | --- |
|  | J. Org. Chem., 2007, 72, 6298–6300.  1H NMR (500 MHz, CDCl3) ppm 1.34 (s, 9H), 7.10-7.15 (m, 1H), 7.35-7.29 (m, 2H), 7.49-7.53 (m, 2H), 8.1 (br. s, 1H)  13C NMR (125 MHz, DMSO-*d6*)  ppm26.15, 38.06, 119.44, 122.15, 127.04, 137.80, 175.75  ESI-MS calcdfor C11H15NO (M+H)+ 178.1231,found 178.1137 |
|  | Eur. J. Med. Chem., 2010, 45, 4300-4306.  1H NMR (500 MHz, CDCl3) ppm 6.32 (s, 1 H) 7.12-7.16 (m, 1 H) 7.31-7.34 (m, 2 H) 7.61-7.63 (m, 2 H), 9.99 (br, 1H)  13C NMR (125 MHz, DMSO-*d6*)  ppm66.69, 119.82, 124.55, 128.51, 136.89, 161.87  ESI-MS calcd for C8H7Cl2NO (M+H)+203.99, found 204.01, 206.00 (M+H+2)+ |
|  | J. Am. Chem. Soc., 2008, 130, 17672-17673.  1H NMR (500 MHz, CDCl3) ppm 3.63, (s, 2H), 7.17-7.37 (m, 8H), 7.56-7.62 (m, 2H), 9.83 (br.s, 1H)  13C NMR (125 MHz, DMSO-*d6*)  ppm 42.87, 118.84, 122.64, 125.71, 127.40, 127.61, 128.15, 134.68, 137.89, 168.88  ESI-MS calcd for C14H13NO(M-H)+210.0912, found 210.1502 |
|  | J. Chem. Soc., Perkin Trans 1: 1990, (2), 277-82.  1H NMR (500 MHz, CDCl3) ppm 2.56 (t, *J*=7.3 Hz, 2H), 3.60 (t, *J*=7.3 Hz, 2H), 7.12-7.16 (m, 1H), 7.29-7.34 (m, 2H), 7.51-7.54 (m, 2H), 8.02 (br, 1H)  ESI-MS calcd for C9H10ClNO (M+H)+184.0528, found 184.1242 |
|  | 1H NMR (500 MHz, CDCl3)  ppm 2.30 (s, 3H), 2.51 (t, *J*=7.3 Hz, 2H), 3.60 (t, *J*=7.3 Hz, 2H), 7.1(d, *J*=8.5 Hz, 2H), 7.4 (d= 8.5 Hz, 2H), 8.2 (br, 1H)  13C NMR (125 MHz, CDCl3)  ppm 20.69, 33.84, 44.34, 120.26, 129.23, 133.85, (135.10), 170.51  ESI-MS calcd for C10H12ClNO (M+H)+ 198.0685, found 198.0792 |
|  | J. Org. Chem., 2009, 74, 6358–6361.  1H NMR (500 MHz, CDCl3)  ppm 1.0-1.22 (m, 3H), 1.3-1.52 (m, 2H), 1.64-1.80 (m, 1H), 2.04-2.18 (m, 4H),2.1 (s, 3H), 3.67 (br, 1H), 4.5 (m, 1H), 7.40-7.50(m, 2H), 7.6-7.72 (m, 2H)  13C NMR (125 MHz, CDCl3)  ppm 20.76, 24.39, 24.71, 32.11, 48.07, 126.51, 128.9, 131.37, 142.47, 166.10  ESI-MS calcd for C14H19NO (M+H)+ 218.1544, found 218.1156 |
|  | Org. Lett., 2011, 13, 4684-4687.  1H NMR (500 MHz, CDCl3) ppm 1.15-1.27 (m, 3H), 1.34-1.44 (m 2H), 1.61-1.67 (m,1H), 1.70-1.78 (m, 2H), 1.97-2.05 (m, 2H), 3.95 (s, 1H), 6.52- (*J*=15.5 Hz, 1H), 7.31-7.41 (m, 5H), 7.66 (*J*=15.5 Hz, 1H).  13C NMR (125 MHz, CDCl3)  ppm 24.92, 25.54, 33.16, 48.57, 121.13, 127.81, 128.78, 129.58, 134.51, 140.86, 165.43  ESI-MS calcd for C15H19NO(M+H)+230.1544, found 230.1170 |
|  | Tetrahedron, 2009, 65, 3480-3485.  1H NMR (500 MHz, DMSO- *d6*) ppm 7.14 (t, *J*=7.41 Hz, 1H) 7.38 (t, *J*=7.88 Hz, 2H) 7.81 (d, *J*=7.88 Hz, 2H) 8.2 (d, *J*=8.33Hz, 2H) 8.35 (d, *J*=8.33 Hz, 2H), 10.60 (s, 1H)  13C NMR (125 MHz, DMSO-*d6*)  ppm 120.57, 123.55, 124.21, 128.74, 129.27, 138.80, 140.64, 149.14, 163.90  ESI-MS calcd for C13H10N2O3 (M+H)+243.2380, found 243.0512 |
|  | Org. Prep.Proced. Int., 2005, 37, 198-203.  1H NMR (500 MHz, DMSO- *d6*) ppm 2.26 (s, 3H), 7.12(d, *J*=7.9Hz, 2H), 7.64 (d, *J*=7.9Hz, 2H), 8.1 (d, *J*=8.4Hz, 2H), 8.30 (d, *J*=8.4Hz, 2H), 10.5 (br. s, 1H)  13C NMR (125 MHz, DMSO-*d6*)  ppm 20.60, 120.59, 123.83, 129.12, 130.76, 135.33, 136.27, 140.72, 150.04, 163.66  ESI-MS calcd for C14H12N2O3 (M+H)+257.0925, found 257.1242 |
|  | Tetrahedron, 2009, 65, 3480-3485.  1H NMR (500 MHz, DMSO-*d6*) ppm 8.07 (d, *J*=9.1 Hz, 2H), 8.18 (d, *J*=9.1 Hz, 2H), 8.30 (d, *J*=8.51 Hz, 2H), 8.41 (d, *J*=8.51 Hz, 4 H), 11.12 (s, 1H)  13C NMR (125 MHz, DMSO-*d6*)  ppm 114.35, 118.05, 119.32, 124.16, 133.95, 137.85, 140.12, 144.05, 159.45  ESI-MS calcd for C13H9N3O5 (M+H)+287.0542, found 287.0675 |
|  | mp 102 °C (Tetrahedron, 2000, 56, 4521-4529)  1H NMR (500 MHz, CDCl3)  ppm 0.91 (t, *J*=7.4 Hz, 3H), 1.25-1.32 (m, 2H), 1.42-1.48 (m, 2H), 3.23-3.30 (m, 2H), 4.96 (s, 1H), 6.18 (br, 1H), 7.27-7.37 (m 10 H)  13C NMR (125 MHz, CDCl3)  ppm 13.57, 19.84, 31.32, 39.38, 58.71, 126.94, 128.47, 128.71, 139.54, 171.78  ESI-MS calcd for C18H21NO(M+H)+ 268.3734, found 268.1700 |
|  | Chem. Biol., 2006, 13, 427-435.  1H NMR (500 MHz, DMSO- *d6*) ppm 7.14 (t, 2H, *J* = 7.0Hz), 7.39 ( t, 4H, *J*= 7.5Hz), 7.71 (t, 1H, *J* = 7.7 Hz), 7.84 ((d, 4H, *J* = 7.7 Hz), 8.16-8.19 (m, 2H), 8.60 (s, 1H), 10.50 (s, 2H).  13C NMR (125 MHz, DMSO-*d6*)  ppm120.45, 123.89, 127.09, 128.73, 130.75, 135.24, 139.13, 165.14  ESI-MS calcd for C20H16N2O2 (M+H)+317.3612, found 317.1019 |
|  | 1H NMR (500 MHz, CDCl3)  ppm 2.29 (s, 6H), 7.06-7.15 (m, 4H), 7.54-7.70 (m, 2H), 7.70-7.77 (m, 2H), 8.10-8.24 (m, 2H), 8.53-8.61 (m, 2H), 10.40 (br.s, 2H)  13C NMR (125 MHz, CDCl3)  ppm 20.55, 120.40, 126.84, 128.45, 128.84, 129.64, 130.51, 132.66, 135.08, 164.82  ESI-MS calcd for C22H20N2O2 (M+H)+345.4143, found 345.1098 |
|  | Chem. Eur. J., 2011, 17, 2763-2768.  1H NMR (500 MHz, CDCl3)  ppm 1.35 (d, *J*=6.9 Hz, 6H), 2.85 (dt, *J* =13.6 Hz, 6.9 Hz, 1H), 7.21-7.25 (m, 1H), 7.48-7.51 (m 2H), 7.89-7.92 (m, 2H), 10.08 (br. s, 1H)  13C NMR (125 MHz, CDCl3)  ppm 19.55, 35.07, 119.31, 122.96, 128.60, 139.58, 175.33  ESI-MS calcd for C10H13NO(M+H)+ 164.1075, found 164.0808 |
|  | 1H NMR (500 MHz, CDCl3)  ppm 3.47 (s, 2H), 3.73 (s, 3H), 7.10-7.15 (m, 1H), 7.28-7.31 (m 2H), 7.55-7.58 (m, 2H), 9.31 (br. s, 1H)  13C NMR (125 MHz, CDCl3)  ppm 42.26, 52.60, 120.29, 124.67, 128.97, 137.60, 163.84, 169.55  ESI-MS calcd for C10H11NO3(M+H)+ 194.0816, found 194.0529 |
|  | Bioorganic Med. Chem. Lett., 2010, 20, 2044-2047.  1H NMR (500 MHz, CDCl3)  ppm 1.41-1.52 (m, 2H), 1.61-1.75 (m, 2H), 1.80-1.90 (m, 2H), 2.31-2.39 (m, 2H), 3.33-3.43 (m, 2H), 7.06-7.12 (m, 1H), 7.26-7.33 (m, 2H), 7.52-7.56 (m, 2H), 8.21 (br.s, 1H)  13C NMR (125 MHz, CDCl3)  ppm 24.57, 27.53, 32.33, 33.55, 37.02, 120.03, 124.13, 128.72, 137.80, 171.66  ESI-MS calcd for C12H16BrNO(M+H)+270.0493, found 270.0125, 272.0105 |
|  | m.p. 110-111 °C (J. Org. Chem., 2005, 70, 8645-8648)  1H NMR (500 MHz, CDCl3) ppm 0.77-0.83 (m, 2H), 1.06-1.10 (m, 2H), 1.58-1.65 (m, 1H), 7.10 (t, *J* = 7.2 Hz, 1H), 7.20 (t, *J* = 9.0 Hz, 2H), 7.55 (d, *J* = 8.7 Hz, 2H), 8.69 (s, 1H)  13C NMR (125 MHz, CDCl3)  ppm 7.66, 15.16, 120.05, 123.78, 128.58, 138.12, 172.83  ESI-MS calcd for C10H11NO (M+H)+162.2084, found 162.0614 |
|  | 1H NMR (500 MHz, CDCl3)  ppm 1.14-1.24 (m, 3H), 1.32-1.43 (m, 2H), 1.59-1.67 (m, 1H), 1.68-1.77 (m, 2H), 1.87-1.96 (m, 2H), 3.42 (s, 3H), 3.78-3.84 (m, 1H), 3.87 (s, 2H), 6.45 (br. s, 1H)  13C NMR (125 MHz, CDCl3)  ppm 24.62, 25.26, 32.84, 47.27, 58.84, 71.76, 168.23  ESI-MS calcd for C9H17NO2 (M+H)+172.2447, found 172.3450 |
|  | 1H NMR (500 MHz, CDCl3)  ppm 2.34 (s, 3H), 3.5 (s, 3H), 4.02 (s, 2H), 7.16 (d, *J*=8.2 Hz, 2H), 7.48 (d, *J*=8.2 Hz, 2H), 8.26 (br. S. 1H)  13C NMR (125 MHz, CDCl3)  ppm 20.75, 59.11, 71.92, 115.3, 119.71, 129.37, 134.43, 167.31  ESI-MS calcd for C10H13NO2 (M-OCH3)+ 148.0762, found 148.1322 |
|  | Chem. Eur. J., 2009, 15, 6953-6963.  1H NMR (500 MHz, CDCl3)  ppm 1.08-1.2 (m, 3H), 1.29-1.41 (m, 2H), 1.58-1.65 (m, 1H), 1.67-1.74 (m, 2H), 1.87-1.94 (m, 2H), 1.96 (s, 3H), 3.69-3.79 (m, 1H), 5.79 (br. S. 1H)  13C NMR (125 MHz, CDCl3)  ppm 23.42, 24.80, 25.40, 33.05, 48.13, 169.12 |
|  | Org. Lett., 2011, 13, 4–7.  1H NMR (500 MHz, CDCl3) ppm 0.86 (t, *J*=7.4Hz, 3H), 1.28-1.34 (m, 2H), 1.41-1.47 (m, 2H), 3.20-3.23 (m 2H), 6.60 (d, *J*=15.5Hz, 1H), 7.33-7.39 (m, 3H), 7.54-7.58 (m, 2H), 7.63 (d, *J*=15.5Hz), 8.24 (br. s, 1H)  13C NMR (125 MHz, DMSO-*d6*)  ppm13.70, 19.78, 31.38, 38.53, 122.50, 127.54, 128.92, 129.35, 135.12, 142.45, 168.57  ESI-MS calcd for C13H17NO (M+H)+ 204.2881 found 204.1126 |
|  | Angew. Chem., Int. Ed., 2011, 50, 8917-8921.  1H NMR (500 MHz, CDCl3) ppm6.51-6.54 (m, 1H), 7.05-7.08 (m, 1H), 7.26-7.32 (m, 3H), 7.60 (s, 1H), 7.77-7.81 (m, 2H), 9.84 (s, 1H)  13C NMR (125 MHz, CDCl3)  ppm 110.61, 113.23, 119.21, 122.51, 127.17, 136.94, 143.34, 146.44, 155.18  ESI-MS calcd for C11H9NO2 (M+H)+188.2026, found 188.0556 |
|  | m.p, 40-41°C (J. Am. Chem. Soc., 1940, 62, 1960-62).  1H NMR (500 MHz, CDCl3) ppm 0.84 (t, *J* = 7.2 Hz, 3H), 1.28-1.34 (m, 2H), 1.49-1.55 (m, 2H), 3.34-3.39 (m, 2H), 6.39-6.42 (m, 1H), 7.14-7.16 (m, 1H), 7.36-7.38 (m, 1H), 7.74 (br, S, 1H)  13C NMR (125 MHz, CDCl3)  ppm 13.43, 19.76, 31.28, 38.95, 111.85, 114.50, 144.07, 147.06, 158.58  ESI-MS calcd for C9H13NO2 (M+H)+168.2130, found 168.0984 |

inCH2Cl2

PhNH2-Bn-NH2-buffer

in buffer

1H-Leucinol

13C-Leucinol


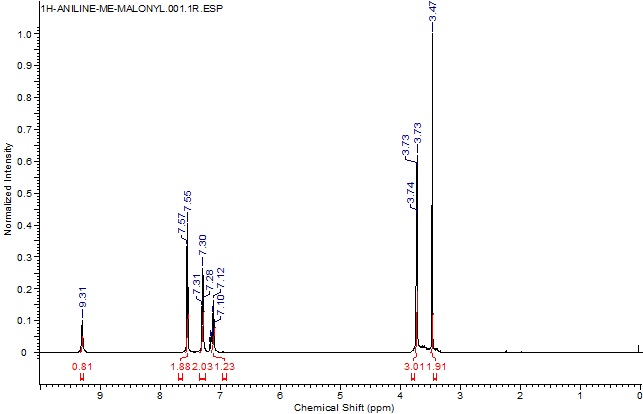


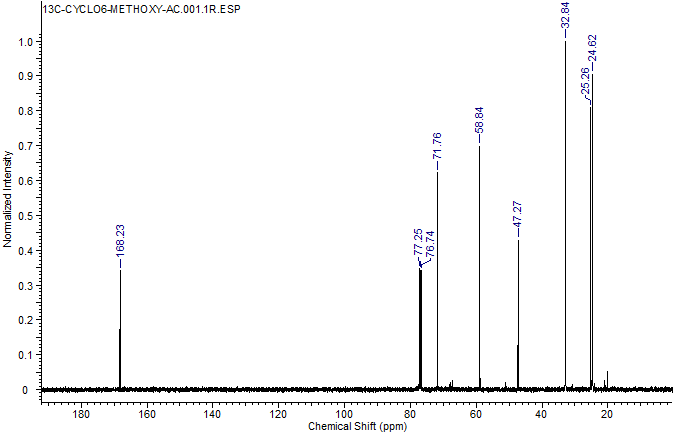

Supplement: Supplementary file 1 [file 13596995]
